# Supplementary material for: Transcriptome and Metabolome Analyses in Exogenous FABP4- and FABP5-Treated Adipose-Derived Stem Cells
Source: PubMed Central journal article supplement (PMC5148007; doi:10.1371/journal.pone.0167825), 2016-12-09

Figure S4

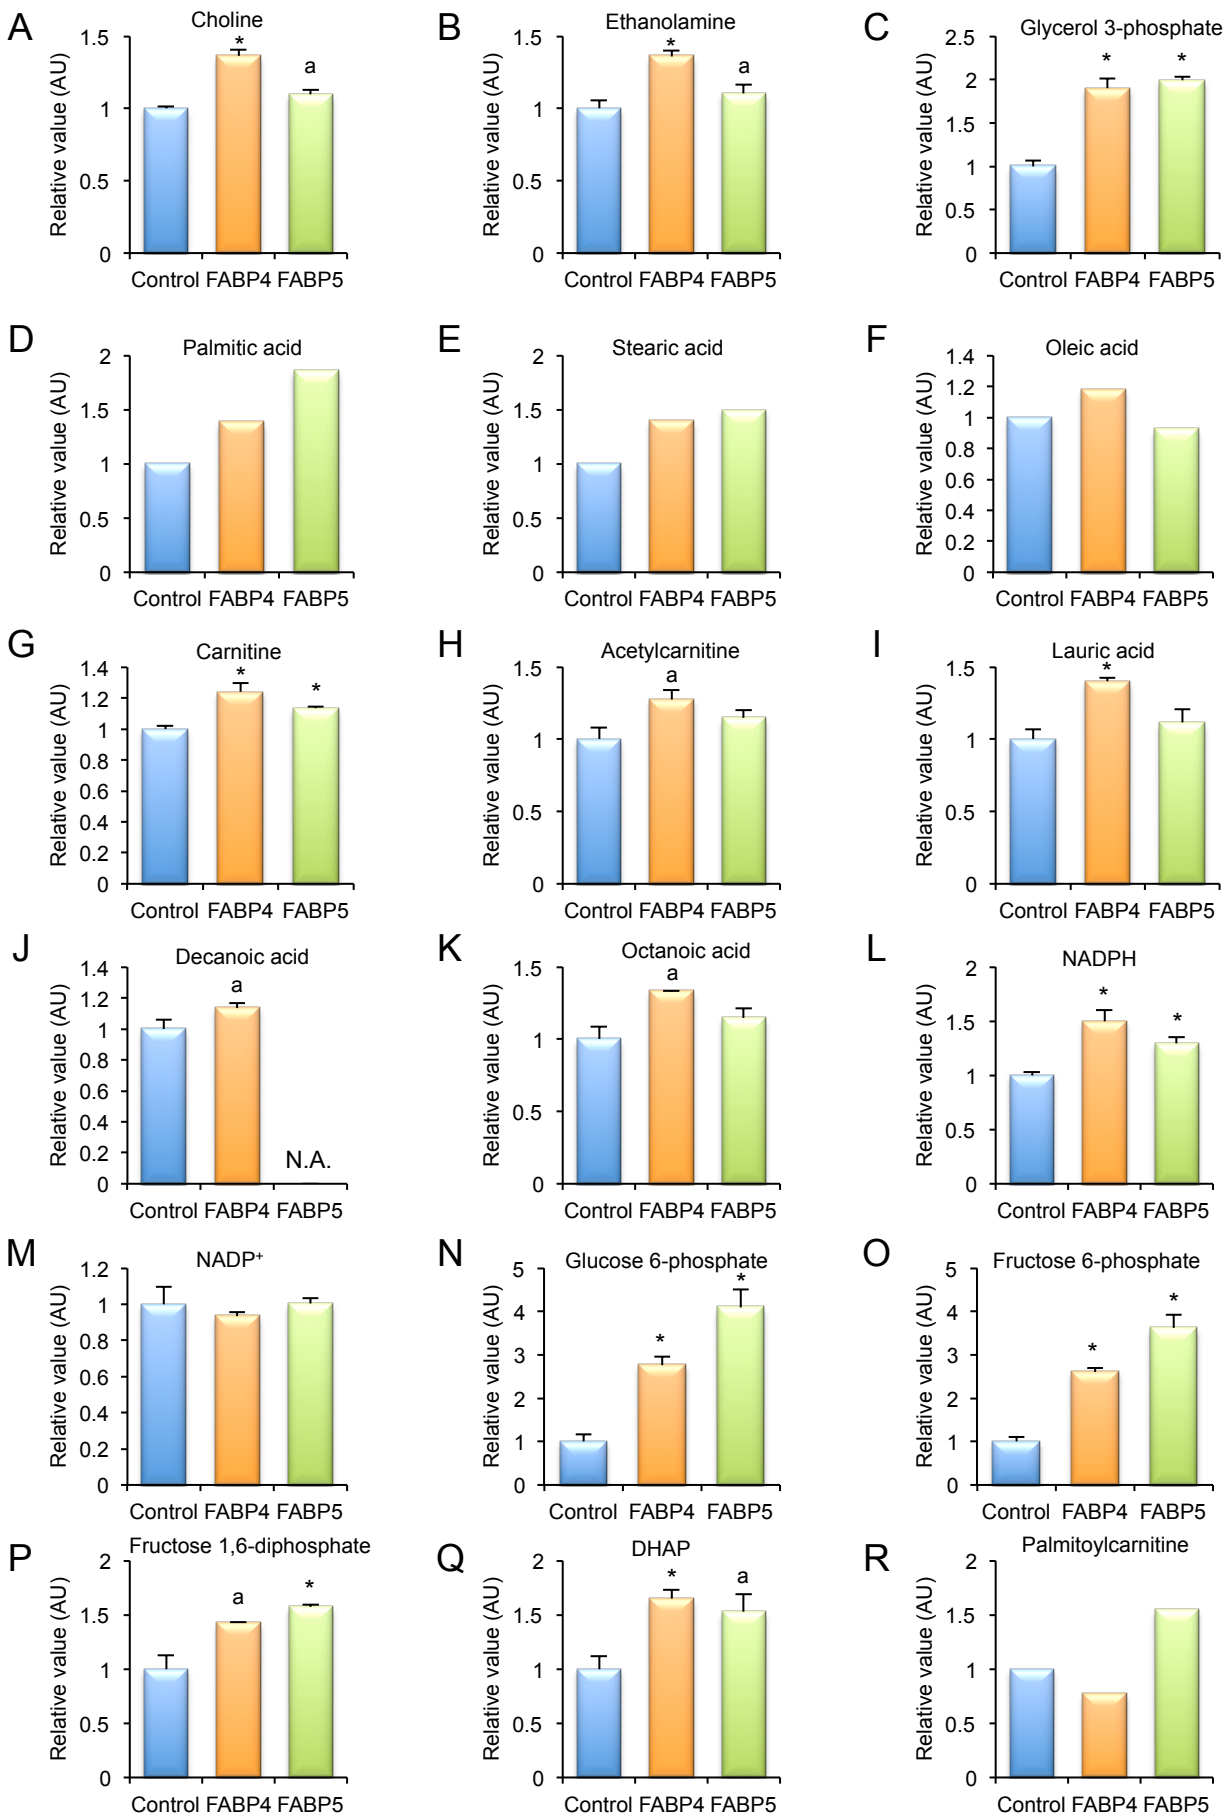

Supplement: pone.0167825.s008.pdf [file pone.0167825.s008.pdf]
