# Supplementary material for: Transcriptome and Metabolome Analyses in Exogenous FABP4- and FABP5-Treated Adipose-Derived Stem Cells
Source: PubMed Central journal article supplement (PMC5148007; doi:10.1371/journal.pone.0167825), 2016-12-09
Supplement: pone.0167825.s011.pdf [file pone.0167825.s011.pdf]

## S2 Table

Table S2. Key node analysis (FABP5 in ADSC)

| Node              | Counts |
|-------------------|--------|
| FLI1              | 58     |
| JAK2              | 56     |
| p65PAK-isoform1   | 52     |
| ONECUT1           | 51     |
| Cdk1-isoform1     | 48     |
| Grb-2-Isoform1    | 44     |
| FOXO1             | 43     |
| AKT-1             | 36     |
| 14-3-3zeta        | 31     |
| FOXP3             | 30     |
| IRS-1             | 30     |
| SOX2              | 30     |
| TCF7              | 30     |
| beta-catenin      | 28     |
| CDX1              | 28     |
| ErbB2             | 24     |
| Src-isoform1      | 24     |
| DNA-PKcs-isoform1 | 23     |
| IKK-beta          | 23     |
| LynA              | 23     |
| LynB              | 21     |
| Tyk2              | 21     |
| NIK               | 20     |
| ERK1              | 19     |
| Jak1              | 19     |
| AKT1              | 18     |
| SHP2-isoform2     | 17     |
| ERK2              | 16     |
| Smad4             | 16     |
| p53beta           | 14     |
| Jak3              | 13     |
| SHP-1L            | 12     |
| lepr-B            | 11     |
| NLK               | 11     |

Nodes (Counts <10) were omitted.
