# Supplementary material for: Transcriptome and Metabolome Analyses in Exogenous FABP4- and FABP5-Treated Adipose-Derived Stem Cells
Source: PubMed Central journal article supplement (PMC5148007; doi:10.1371/journal.pone.0167825), 2016-12-09
Supplement: pone.0167825.s012.pdf [file pone.0167825.s012.pdf]

### S3 Table

Table S3. Key node analysis (FABP4 in 233A)

| Node                | Counts |
|---------------------|--------|
| FOXA2               | 30     |
| FOSL1               | 29     |
| CEBPB               | 26     |
| JUNB                | 26     |
| CEBPA               | 25     |
| IPF1                | 25     |
| VDR                 | 22     |
| FOXF1               | 20     |
| POU5F1              | 18     |
| SPI1                | 18     |
| SRF                 | 18     |
| FOS                 | 17     |
| FOSB                | 17     |
| JUND                | 17     |
| mdm2-isoform1       | 17     |
| p/CAF               | 17     |
| Smad3               | 17     |
| TAL1                | 16     |
| TFEC                | 16     |
| MAPKAPK3            | 15     |
| POU1F1              | 15     |
| AKT-1               | 14     |
| HIF-1alpha-isoform1 | 14     |
| p53-isoform1        | 14     |
| SGK-1-isoform1      | 14     |
| 14-3-3zeta          | 13     |
| JNK1alpha1          | 13     |
| RSK1                | 13     |
| SGK1                | 13     |
| HOXB3               | 12     |
| JUN                 | 12     |
| p300                | 12     |
| p38alpha            | 12     |
| JNK1beta1           | 11     |
| NeuroD              | 11     |
| NKX2-2              | 11     |

Nodes (Counts <10) were omitted.
