# Supplementary material for: Transcriptome and Metabolome Analyses in Exogenous FABP4- and FABP5-Treated Adipose-Derived Stem Cells
Source: PubMed Central journal article supplement (PMC5148007; doi:10.1371/journal.pone.0167825), 2016-12-09
Supplement: pone.0167825.s015.pdf [file pone.0167825.s015.pdf]

## S6 Table

Table S6. Regulated metabolites by FABP4 in ADSC (CE-TOFMS)

| ID     | Compound name                                         | Ratio | P     |
|--------|-------------------------------------------------------|-------|-------|
| C_0047 | 1-Methylnicotinamide                                  | 1.3   | 0.001 |
| A_0045 | Glucose 6-phosphate                                   | 2.8   | 0.003 |
| A_0015 | Ethanolamine phosphate                                | 1.2   | 0.005 |
| A_0024 | Glycerol 3-phosphate                                  | 1.9   | 0.006 |
| C_0070 | Arg                                                   | 1.2   | 0.006 |
| C_0013 | Choline                                               | 1.4   | 0.007 |
| C_0061 | His                                                   | 1.2   | 0.009 |
| C_0001 | Ethanolamine                                          | 1.4   | 0.010 |
| C_0025 | Thr                                                   | 1.2   | 0.010 |
| A_0020 | Pelargonic acid                                       | 1.4   | 0.014 |
| C_0024 | Val                                                   | 1.2   | 0.014 |
| A_0022 | Dihydroxyacetone phosphate                            | 1.6   | 0.015 |
| C_0026 | Homoserine                                            | 1.2   | 0.016 |
| A_0042 | Fructose 6-phosphate                                  | 2.6   | 0.018 |
| A_0051 | <i>N</i> -Acetylneuraminic acid                       | 1.4   | 0.018 |
| C_0072 | Tyr                                                   | 1.1   | 0.019 |
| C_0075 | Gly-Asp                                               | 1.1   | 0.020 |
| C_0081 | XC0061                                                | 1.7   | 0.021 |
| C_0051 | 4-Guanidinobutyric acid                               | 1.2   | 0.022 |
| A_0034 | Lauric acid                                           | 1.4   | 0.022 |
| A_0012 | 4-Methyl-2-oxovaleric acid 3-Methyl-2-oxovaleric acid | 1.5   | 0.023 |
| C_0036 | <i>cis</i> -4-Hydroxyproline                          | 1.8   | 0.025 |
| C_0103 | <i>S</i> -Adenosylmethionine                          | 1.1   | 0.025 |
| C_0057 | Glu                                                   | 1.2   | 0.027 |
| C_0102 | XC0132                                                | 1.3   | 0.027 |
| C_0039 | Ile                                                   | 1.2   | 0.030 |
| A_0061 | NADPH_divalent                                        | 1.5   | 0.031 |
| C_0040 | Leu                                                   | 1.2   | 0.035 |
| A_0071 | XA0065                                                | 1.2   | 0.036 |
| C_0041 | Asn                                                   | 1.2   | 0.036 |
| C_0074 | <i>N</i> -Acetyllysine                                | 1.3   | 0.040 |
| C_0094 | 2'-Deoxyguanosine                                     | 0.6   | 0.041 |
| C_0052 | $\gamma$ -Butyrobetaine                               | 1.2   | 0.043 |
| C_0093 | Adenosine                                             | 0.6   | 0.044 |
| C_0104 | Cysteine glutathione disulfide                        | 1.6   | 0.044 |
| C_0090 | Isovalerylcarnitine                                   | 1.2   | 0.044 |
| A_0065 | CDP                                                   | 0.7   | 0.046 |
| A_0044 | <i>myo</i> -Inositol 2-phosphate                      | 1.4   | 0.047 |
| C_0063 | Carnitine                                             | 1.2   | 0.048 |
| C_0044 | Asp                                                   | 1.1   | 0.050 |
