# Supplementary material for: Transcriptome and Metabolome Analyses in Exogenous FABP4- and FABP5-Treated Adipose-Derived Stem Cells
Source: PubMed Central journal article supplement (PMC5148007; doi:10.1371/journal.pone.0167825), 2016-12-09
Supplement: pone.0167825.s016.pdf [file pone.0167825.s016.pdf]

## S7 Table

Table S7. Regulated metabolites by FABP5 in ADSC (CE-TOFMS)

| ID     | Compound name                    | Ratio | P     |
|--------|----------------------------------|-------|-------|
| A_0024 | Glycerol 3-phosphate             | 2.0   | 0.001 |
| A_0044 | <i>myo</i> -Inositol 2-phosphate | 1.7   | 0.005 |
| A_0042 | Fructose 6-phosphate             | 3.6   | 0.006 |
| C_0026 | Homoserine                       | 1.2   | 0.007 |
| C_0063 | Carnitine                        | 1.1   | 0.008 |
| A_0045 | Glucose 6-phosphate              | 4.1   | 0.009 |
| C_0047 | 1-Methylnicotinamide             | 1.2   | 0.010 |
| C_0019 | 1-Pyrroline 5-carboxylic acid    | 2.5   | 0.011 |
| C_0042 | Ornithine                        | 1.3   | 0.013 |
| A_0051 | <i>N</i> -Acetylneuraminic acid  | 1.4   | 0.014 |
| C_0098 | Guanosine                        | 0.3   | 0.014 |
| A_0065 | CDP                              | 0.4   | 0.015 |
| A_0061 | NADPH_divalent                   | 1.3   | 0.017 |
| C_0093 | Adenosine                        | 0.2   | 0.017 |
| A_0066 | UDP                              | 0.5   | 0.020 |
| A_0058 | AMP                              | 0.8   | 0.021 |
| C_0081 | XC0061                           | 1.8   | 0.021 |
| A_0011 | 5-Oxoproline                     | 0.7   | 0.025 |
| A_0036 | Phosphocreatine                  | 1.2   | 0.033 |
| A_0069 | ADP                              | 0.8   | 0.035 |
| C_0102 | XC0132                           | 1.2   | 0.037 |
| C_0094 | 2'-Deoxyguanosine                | 0.6   | 0.040 |
| A_0056 | Fructose 1,6-diphosphate         | 1.6   | 0.044 |
| C_0074 | <i>N</i> -Acetyllysine           | 1.3   | 0.049 |
