# Supplementary material for: Transcriptome and Metabolome Analyses in Exogenous FABP4- and FABP5-Treated Adipose-Derived Stem Cells
Source: PubMed Central journal article supplement (PMC5148007; doi:10.1371/journal.pone.0167825), 2016-12-09
Supplement: pone.0167825.s017.pdf [file pone.0167825.s017.pdf]

## S8 Table

Table S8. Regulated metabolites by FABP4 and FABP5 (LC-TOFMS)

| ID     | Compound name                                 | Ratio |       |
|--------|-----------------------------------------------|-------|-------|
|        |                                               | FABP4 | FABP5 |
| P_0005 | Oleoyl ethanolamide                           | 1.3   | 1.1   |
| P_0017 | Trilaurin                                     | 0.9   | 1.0   |
| P_0006 | Stearoyl ethanolamide                         | 0.9   | 1.0   |
| N_0008 | Stearic acid                                  | 1.4   | 1.5   |
| N_0004 | Palmitic acid                                 | 1.4   | 1.9   |
| P_0003 | Palmitoylethanolamide                         | 0.9   | 1.0   |
| N_0024 | 1-Palmitoyl-glycero-3-phosphoethanolamine     | 1.2   | 1.1   |
| P_0014 | 1-Oleoyl-glycero-3-phosphocholine             | 1.3   | 0.8   |
| P_0021 | 1,2-Distearoyl-glycero-3-phosphocholine       | 0.7   | 1.0   |
| P_0010 | Palmitoylcarnitine                            | 0.8   | 1.6   |
| P_0002 | Sphingosine                                   | 0.9   | 0.8   |
| P_0015 | 1-Hexadecyl-2-acetyl-glycero-3-phosphocholine | 0.9   | 1.0   |
| P_0012 | 1-Myristoyl-glycero-3-phosphocholine          | 1.1   | 0.9   |
| P_0013 | 1-Palmitoyl-glycero-3-phosphocholine          | 1.0   | 0.9   |
| P_0018 | Sphingomyelin(d18:1/16:0)                     | 0.8   | 0.8   |
| N_0026 | Cholesterol sulfate                           | 0.9   | 0.9   |
| P_0016 | 1-Stearoyl-glycero-3-phosphocholine           | 0.9   | 1.0   |
| P_0019 | Sphingomyelin(d18:1/18:0)                     | 0.7   | 0.8   |
| P_0008 | Cholesterol                                   | 0.7   | 0.8   |
| N_0007 | Oleic acid                                    | 1.2   | 0.9   |
