# Supplementary material for: Transcriptome and Metabolome Analyses in Exogenous FABP4- and FABP5-Treated Adipose-Derived Stem Cells
Source: PLoS One. 2016 Dec 9;11(12):e0167825. doi: 10.1371/journal.pone.0167825 (PMC5148007; doi:10.1371/journal.pone.0167825)
Supplement: S5 Table — (PDF) [file pone.0167825.s014.pdf]

## S5 Table

Table S5. Standardized relative areas of clustering analysis by HCA (CE-TOFMS)

| ID | Compound name                                  | ms/z   | MTIRT  | Control #1 | Control #2 | Control #3 | FABP#1 | FABP#2 | FABP#3 | FABP#4 | FABP#5 | FABP#6 |
|----|------------------------------------------------|--------|--------|------------|------------|------------|--------|--------|--------|--------|--------|--------|
| 1  | C-0008 Cyclohexanamine                         | 100.11 | 7.54   | 1.992      | 1.455      | 1.737      | 1.014  | 1.607  | 0.852  | 0.852  | 1.271  | 1.662  |
| 2  | C-0043 Thiaprine                               | 134.03 | 13.77  | -0.273     | 1.304      | 0.922      | 0.217  | 1.049  | -1.270 | -1.292 | 0.275  | -0.932 |
| 3  | C-0058 Penicillamine                           | 150.06 | 11.74  | 1.018      | 0.694      | 1.278      | -0.833 | 1.175  | -0.833 | -0.833 | -0.833 | -0.833 |
| 4  | C-0029 2-Amino-2-hydroxymethyl-1,3-propanediol | 122.08 | 8.18   | 2.213      | -0.493     | -0.493     | -0.493 | 1.199  | -0.493 | -0.451 | -0.483 | -0.483 |
| 5  | A-0087 NADP <sup>+</sup>                       | 742.07 | 9.31   | 2.198      | -0.465     | -1.114     | 0.703  | 0.498  | -0.353 | -0.695 | -0.674 | -0.004 |
| 6  | C-0069 N-Ethylglutamine                        | 175.17 | 11.22  | 0.895      | 1.236      | -0.839     | 1.123  | 0.839  | -0.839 | -0.839 | -0.839 | -0.839 |
| 7  | C-0082 β-Ala-Lys                               | 218.15 | 6.78   | -0.058     | 1.220      | 0.307      | 0.280  | 0.84   | 0.653  | -1.656 | -1.656 | 0.527  |
| 8  | C-0077 Spermine                                | 203.22 | 4.41   | 0.874      | 0.607      | -0.408     | 0.298  | 1.431  | 0.696  | -1.167 | -1.167 | -1.167 |
| 9  | C-0101 Glutathione (GSH)                       | 309.09 | 13.08  | 0.471      | -0.112     | -1.373     | 0.392  | 1.213  | 1.583  | -0.744 | -0.472 | -1.070 |
| 10 | C-0028 Cys                                     | 122.03 | 11.18  | -0.236     | 0.657      | -1.226     | -0.218 | 1.148  | 1.735  | -0.098 | -0.781 | -1.011 |
| 11 | C-0067 Saccharose                              | 277.14 | 10.51  | -0.858     | -0.431     | -1.001     | 0.763  | 0.881  | 0.084  | -0.205 | -0.952 | 0.469  |
| 12 | C-0062 2-Aminoadipic acid                      | 162.08 | 10.82  | -0.521     | 0.129      | -0.875     | 0.071  | 1.544  | 0.854  | -1.488 | -0.381 | 0.268  |
| 13 | C-0033 Pipecolic acid                          | 130.09 | 10.16  | 0.151      | 0.189      | -0.008     | 0.124  | 0.750  | -0.128 | -0.445 | 1.087  | 0.299  |
| 14 | A-0049 Setoheptase 7-phosphate                 | 289.03 | 9.56   | 0.618      | 1.119      | -0.448     | -2.302 | -0.852 | 1.006  | -0.552 | 0.486  | 0.445  |
| 15 | A-0054 AMP                                     | 323.10 | 9.74   | 0.599      | 0.324      | -0.112     | -1.459 | -1.321 | -0.071 | -0.547 | 1.286  | 1.304  |
| 16 | A-0058 AMP                                     | 346.05 | 9.24   | 1.313      | 0.480      | 0.173      | -1.026 | -1.467 | -1.177 | 0.022  | 0.761  | 0.920  |
| 17 | A-0025 Decanoic acid                           | 171.14 | 7.88   | 0.658      | 0.635      | 0.307      | -1.317 | -1.317 | -1.317 | 0.664  | 0.823  | 0.864  |
| 18 | A-0069 ADP                                     | 426.02 | 10.81  | 0.936      | 1.357      | -0.143     | 1.238  | -1.483 | -0.736 | 0.018  | 0.924  | 0.363  |
| 19 | A-0070 GDP                                     | 442.01 | 10.58  | 1.084      | 1.840      | -0.727     | -0.962 | -0.210 | -0.408 | -0.312 | 0.325  | 0.325  |
| 20 | A-0039 Ribulose 5-phosphate                    | 229.01 | 10.91  | 1.993      | 1.342      | 0.020      | -0.693 | -0.728 | -0.350 | -0.870 | -0.121 | -0.121 |
| 21 | A-0066 UDP                                     | 402.99 | 11.64  | 1.706      | 1.223      | 0.368      | -1.413 | -0.683 | 0.545  | 0.054  | 0.115  | 0.115  |
| 22 | C-0093 Adenosine                               | 268.10 | 9.78   | 1.657      | 1.142      | 0.617      | -1.104 | -1.032 | 1.093  | -0.287 | -0.065 | 0.136  |
| 23 | C-0065 GDP                                     | 402.01 | 11.42  | 1.371      | 1.800      | 0.549      | -1.186 | -0.948 | -0.103 | -0.103 | 0.311  | 0.311  |
| 24 | A-0014 Threonic acid                           | 135.03 | 9.18   | -0.139     | 1.481      | 0.835      | -1.133 | -0.718 | -0.499 | -0.572 | 1.477  | -0.732 |
| 25 | C-0055 N-Acetylserine                          | 146.06 | 22.59  | -0.223     | 2.145      | 0.634      | -0.553 | -0.369 | 0.040  | -0.480 | 0.287  | -1.480 |
| 26 | A-0073 dTTP                                    | 480.98 | 12.10  | 1.683      | 1.279      | 0.130      | 1.110  | 1.049  | -0.599 | 0.022  | 1.157  | 0.725  |
| 27 | C-0094 2-Deoxyguanosine                        | 268.10 | 11.40  | 0.363      | 1.115      | 1.876      | 0.701  | -0.012 | -0.056 | -0.441 | -0.411 | -1.184 |
| 28 | C-0096 Isoleucine                              | 268.09 | 19.13  | 0.268      | 1.448      | 1.316      | -0.666 | -0.666 | -0.666 | -0.666 | -0.666 | -0.666 |
| 29 | A-0011 5-Oxoproline                            | 128.03 | 9.42   | 0.129      | 1.528      | 0.374      | -1.536 | -0.876 | -0.348 | -0.472 | -0.348 | -0.472 |
| 30 | C-0060 Guanine                                 | 152.06 | 8.20   | -0.199     | 1.975      | 1.075      | -0.135 | -0.930 | -0.862 | 0.001  | -0.008 | 0.085  |
| 31 | A-0010 2-Deoxythymine                          | 151.02 | 11.01  | 0.124      | 1.544      | 1.238      | -0.564 | -0.384 | -0.384 | -0.384 | -0.384 | -0.384 |
| 32 | C-0046 Hypoxanthine                            | 137.04 | 11.01  | 0.375      | 1.418      | 1.172      | -1.189 | -1.189 | -1.189 | -0.334 | 0.199  | 0.438  |
| 33 | C-0098 Guanosine                               | 284.10 | 12.37  | 0.480      | 1.529      | 1.652      | -0.620 | -1.081 | -1.120 | -0.283 | -0.354 | -0.103 |
| 34 | A-0027 3-Phosphoglyceric acid                  | 184.00 | 12.30  | 0.181      | 1.448      | 1.013      | -0.867 | -0.413 | -0.104 | -0.613 | 0.478  | 0.478  |
| 35 | C-0085 2-Deoxyuridine                          | 228.10 | 9.34   | -0.282     | 2.054      | 1.226      | -0.250 | -0.250 | -0.250 | -0.250 | -0.250 | -0.250 |
| 36 | A-0007 Glyceric acid                           | 105.02 | 10.31  | 0.124      | 1.211      | 1.687      | 0.127  | -1.240 | -1.240 | 0.506  | 1.240  | 0.655  |
| 37 | A-0029 3-Phosphoglyceric acid                  | 184.00 | 12.30  | 0.181      | 1.448      | 1.013      | -0.867 | -0.413 | -0.104 | -0.613 | 0.478  | 0.478  |
| 38 | C-0003 Putrescine                              | 89.11  | 4.66   | -0.144     | 1.703      | 1.075      | -0.381 | -1.558 | -0.401 | -1.472 | -0.103 | -0.349 |
| 39 | C-0066 3-Deoxyglucose                          | 146.06 | 10.62  | 0.542      | 0.860      | -0.174     | -0.267 | -0.408 | -0.313 | -1.966 | -0.302 | -0.302 |
| 40 | C-0100 Glutathione (GSSG) divalent             | 307.08 | 12.03  | -1.006     | -0.034     | 0.623      | -0.149 | -1.140 | -1.360 | 1.442  | 0.709  | 0.917  |
| 41 | C-0050 Urocanic acid                           | 139.05 | 8.17   | -1.116     | -1.117     | -0.274     | 0.670  | -0.124 | -0.578 | 2.132  | 0.262  | 0.144  |
| 42 | A-0016 Octanoic acid                           | 143.11 | 8.12   | -0.288     | 0.558      | 0.207      | 0.772  | -0.481 | -1.298 | -0.596 | -1.298 | 0.951  |
| 43 | C-0024 3-Aminoisovaleric acid                  | 118.09 | 10.52  | 0.808      | -0.840     | 0.709      | -0.823 | -0.423 | -0.423 | -0.423 | -0.423 | -0.423 |
| 44 | C-0034 Mevalonic acid                          | 131.07 | 21.61  | -0.118     | 0.244      | -0.617     | 0.753  | 0.753  | 0.753  | 0.658  | -1.887 | 0.562  |
| 45 | C-0039 Argininosuccinic acid                   | 291.13 | 9.33   | 0.307      | 0.852      | -1.819     | 0.309  | -0.332 | 0.591  | 1.473  | -0.752 | -0.397 |
| 46 | C-0063 N-Acetylglutamine                       | 175.17 | 11.75  | 0.446      | -0.146     | -0.146     | 1.541  | -0.646 | -0.646 | 1.615  | 0.646  | 0.646  |
| 47 | A-0050 N-Acetylglucosamine 1-phosphate         | 300.05 | 9.49   | 0.585      | 0.883      | -1.679     | 1.376  | -0.252 | -1.370 | 0.302  | 0.325  | -0.169 |
| 48 | A-0060 GMP                                     | 362.05 | 9.10   | 1.008      | -0.008     | -1.042     | -0.342 | -0.889 | -1.534 | 0.880  | 1.017  | 0.929  |
| 49 | C-0045 Adenine                                 | 136.08 | 7.56   | 0.785      | -1.298     | 0.204      | -0.527 | -0.675 | -1.528 | 0.549  | -1.489 | 0.921  |
| 50 | A-0082 GDP-glucose                             | 568.07 | 8.24   | 0.382      | -0.103     | 0.600      | -0.339 | -0.510 | -1.777 | 0.339  | 0.510  | 1.777  |
| 51 | A-0053 CMP                                     | 322.04 | 9.52   | 1.219      | -1.273     | -1.438     | -0.297 | -0.201 | -0.302 | -0.420 | 0.420  | 1.367  |
| 52 | A-0048 Serbitol 6-phosphate                    | 261.04 | 9.78   | 1.678      | -0.850     | -0.812     | -0.832 | -0.843 | 0.275  | -0.403 | 0.620  | 1.266  |
| 53 | C-0064 5-Hydroxylysine                         | 163.11 | 7.09   | 0.289      | -0.580     | -1.893     | -0.756 | -0.414 | 1.085  | 0.395  | 0.847  | 1.226  |
| 54 | A-0041 XAD03                                   | 242.08 | 7.54   | 0.083      | -1.050     | -0.910     | -0.075 | -0.489 | 0.223  | -0.489 | 0.223  | 0.393  |
| 55 | C-0073 Phosphorylcholine                       | 184.07 | 20.14  | 0.198      | -0.950     | -0.736     | 0.114  | -0.819 | 0.486  | 0.814  | 0.370  | 1.524  |
| 56 | C-0096 Glu                                     | 277.10 | 10.74  | -1.088     | -1.088     | -1.088     | -1.088 | -1.088 | -1.088 | -1.088 | -1.088 | -1.088 |
| 57 | C-0076 11-Aminoundecanoic acid                 | 202.18 | 9.60   | -0.697     | -0.969     | -0.832     | 1.582  | -0.307 | -1.466 | 0.118  | -0.908 | 0.548  |
| 58 | A-0047 2,3-Dihydroxyglutaric acid              | 264.95 | 18.85  | -0.933     | 0.079      | -1.620     | 1.842  | 0.315  | 0.877  | 0.112  | -0.322 | -0.351 |
| 59 | A-0042 Fructose 6-phosphate                    | 259.02 | 9.89   | -0.849     | -1.059     | -1.686     | 0.636  | 0.891  | 1.390  | 0.106  | 0.271  | 0.302  |
| 60 | A-0045 Glucose 6-phosphate                     | 259.02 | 9.78   | -0.915     | -1.203     | -1.332     | 0.468  | 1.283  | 1.390  | -0.149 | 0.131  | 0.327  |
| 61 | C-0042 Creatine                                | 133.10 | 4.17   | -0.147     | 1.474      | 0.847      | -0.344 | -0.344 | -0.344 | -0.344 | -0.344 | -0.344 |
| 62 | C-0019 1-Pyruvone 5-carboxylic acid            | 114.05 | 10.94  | -0.919     | -1.000     | -1.185     | 0.804  | -0.560 | -1.195 | -0.560 | -0.172 | 0.498  |
| 63 | A-0044 myo-Inositol 2-phosphate                | 259.02 | 10.47  | -0.706     | -1.202     | -1.457     | 0.375  | 1.256  | 1.142  | -0.484 | 0.164  | 0.760  |
| 64 | C-0081 XC0061                                  | 218.14 | 9.24   | -0.667     | -1.176     | -1.578     | 0.166  | 0.597  | 1.506  | -0.221 | 0.556  | 0.819  |
| 65 | A-0056 Fructose 1,6-diphosphate                | 338.99 | 14.69  | -0.753     | -0.684     | -2.106     | 1.012  | 0.746  | 0.782  | 0.321  | 0.382  | 0.301  |
| 66 | A-0024 Glycerol 3-phosphate                    | 171.01 | 12.12  | -1.261     | -1.065     | -1.535     | 0.829  | 0.811  | 0.573  | 0.779  | 0.796  | 0.073  |
| 67 | A-0022 Dihydroxyacetone phosphate              | 168.99 | 12.70  | -1.656     | -0.488     | -1.186     | 1.310  | -0.012 | -0.134 | 0.870  | 0.268  | 1.025  |
| 68 | A-0051 N-Acetylneuraminic acid                 | 266.10 | 7.12   | -0.590     | -0.300     | -0.307     | 0.115  | 1.080  | -0.615 | 1.386  | 0.615  | 0.143  |
| 69 | C-0102 XC0152                                  | 325.16 | 8.61   | -0.798     | -1.927     | -0.901     | 0.112  | 0.895  | 0.916  | 0.649  | 0.688  | 0.971  |
| 70 | C-0052 γ-Butyrolactone                         | 146.12 | 8.03   | -1.170     | -1.111     | -0.908     | -0.500 | 0.899  | 0.198  | 1.490  | 0.049  | 1.255  |
| 71 | C-0007 Glycerol                                | 91.05  | 8.75   | 0.875      | 0.875      | 0.875      | 0.875  | 0.875  | 0.875  | 0.875  | 0.875  | 0.875  |
| 72 | C-0026 Homoserine                              | 120.07 | 9.98   | -1.738     | 0.207      | 0.245      | -1.738 | 0.540  | 0.579  | 0.603  | 0.754  | 0.548  |
| 73 | C-0015 Diethanolamine                          | 106.09 | 7.59   | -1.332     | 0.802      | -0.407     | -0.698 | -0.337 | -1.988 | -0.894 | 0.075  | 0.358  |
| 74 | C-0020 Creatine                                | 146.07 | 8.53   | 0.833      | 1.462      | 0.664      | -0.868 | -0.868 | -0.868 | -0.868 | -0.868 | -0.868 |
| 75 | C-0030 Taurine                                 | 126.02 | 11.51  | -1.264     | -0.533     | 1.335      | -1.596 | -0.328 | -0.363 | 0.143  | 1.172  | 0.328  |
| 76 | C-0071 Citrulline                              | 176.10 | 10.20  | -1.705     | -1.164     | 0.337      | -0.271 | 0.381  | -0.354 | 0.352  | 2.009  | 0.857  |
| 77 | C-0063 Methionine sulfoxide                    | 116.05 | 6.22   | -0.766     | 0.871      | 0.159      | 0.787  | 0.787  | 0.787  | 0.787  | 0.787  | 0.787  |
| 78 | C-0086 Butyrylcholine                          | 232.15 | 9.50   | 2.056      | -0.102     | -0.422     | -0.778 | 0.321  | -0.448 | 0.511  | 1.159  | 0.212  |
| 79 | C-0014 Ser                                     | 106.05 | 9.89   | 1.531      | -0.409     | -0.409     | -0.222 | 1.029  | 1.187  | -0.386 | -0.386 | -0.386 |
| 80 | C-0091 Arginophosphocholine                    | 258.11 | 21.20  | -1.051     | 2.092      | -0.691     | -0.499 | -0.562 | -0.949 | 0.772  | 0.028  | -0.108 |
| 81 | A-0035 Mucic acid                              | 209.03 | 14.15  | -1.357     | 2.119      | 0.038      | -0.203 | -0.829 | -0.336 | 0.065  | 0.841  | -0.337 |
| 82 | C-0006 α-Ala                                   | 90.06  | 7.27   | 0.906      | 1.718      | 1.817      | 0.229  | 0.164  | -0.064 | 0.029  | 0.971  | 0.101  |
| 83 | C-0016 Hypoxanthine                            | 110.03 | 17.79  | -1.122     | 1.271      | -1.100     | -0.235 | -0.922 | 0.116  | -0.235 | 0.247  | 0.713  |
| 84 | A-0008 Fumaric acid                            | 115.00 | 26.37  | -0.812     | 1.371      | -0.291     | -1.469 | -0.185 | -0.513 | -0.330 | 1.747  | 0.253  |
| 85 | A-0013 Mucic acid                              | 133.01 | 21.85  | -1.514     | 1.214      | -0.913     | -1.428 | -0.874 | -0.102 | -0.137 | 0.802  | 0.141  |
| 86 | A-0086 NADH                                    | 664.12 | 8.10   | 0.156      | 1.263      | -0.955     | -1.161 | -0.694 | -0.882 | 0.468  | 1.614  | 0.191  |
| 87 | γ-Pyruvone                                     | 209.09 | 10.469 | 0.301      | 0.455      | -0.455     | -0.654 | -0.654 | -0.654 | -0.654 | -0.654 | -0.654 |
| 88 | C-0032 XC0016                                  | 129.07 | 8.70   | -0.387     | -0.354     | -0.354     | -0.354 | -0.354 | -0.354 | -0.354 | -0.354 | -0.354 |
| 89 | A-0004 Lactic acid                             | 89.02  | 10.71  | -0.771     | 1.124      | -0.160     | -1.183 | -1.362 | -0.578 | 0.513  | 0.903  | 1.205  |
| 90 | C-00                                           |        |        |            |            |            |        |        |        |        |        |        |
